# Supplementary material for: Generation of Periventricular Reactive Astrocytes Overexpressing Aquaporin 4 Is Stimulated by Mesenchymal Stem Cell Therapy
Source: MDPI journal article supplement (doi:10.3390/ijms24065640), 2023-03-15
Supplement: s1 [file s1]

**FIGURE S2**

Data Source: Proteins : Abundances (Normalized)  
Distance Function: Pearson  
Linkage Method: Complete  
Scaling: Scale Before Clustering

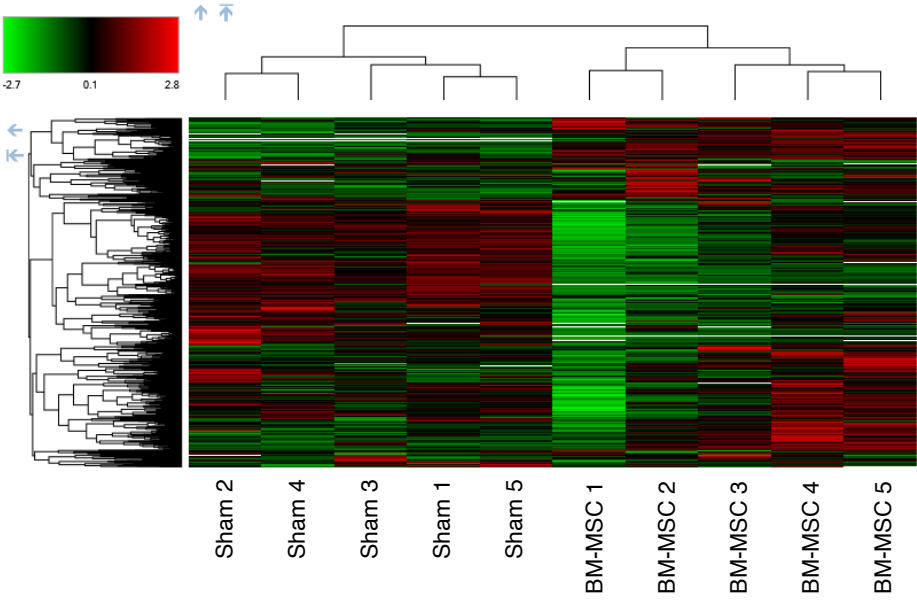

**a**

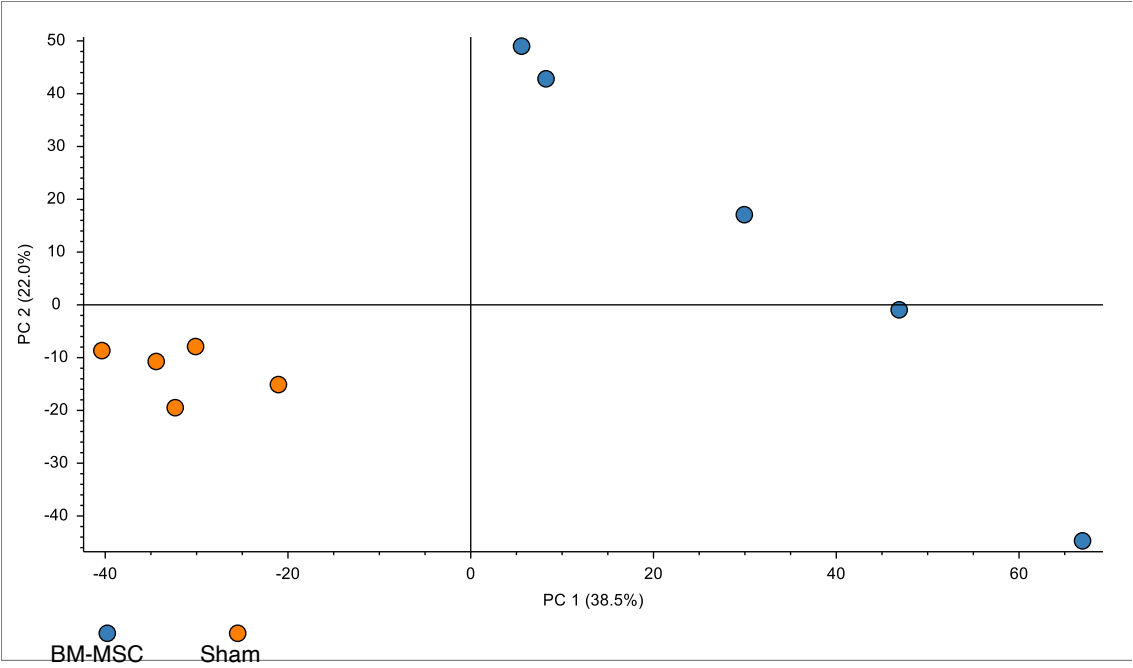

**b**

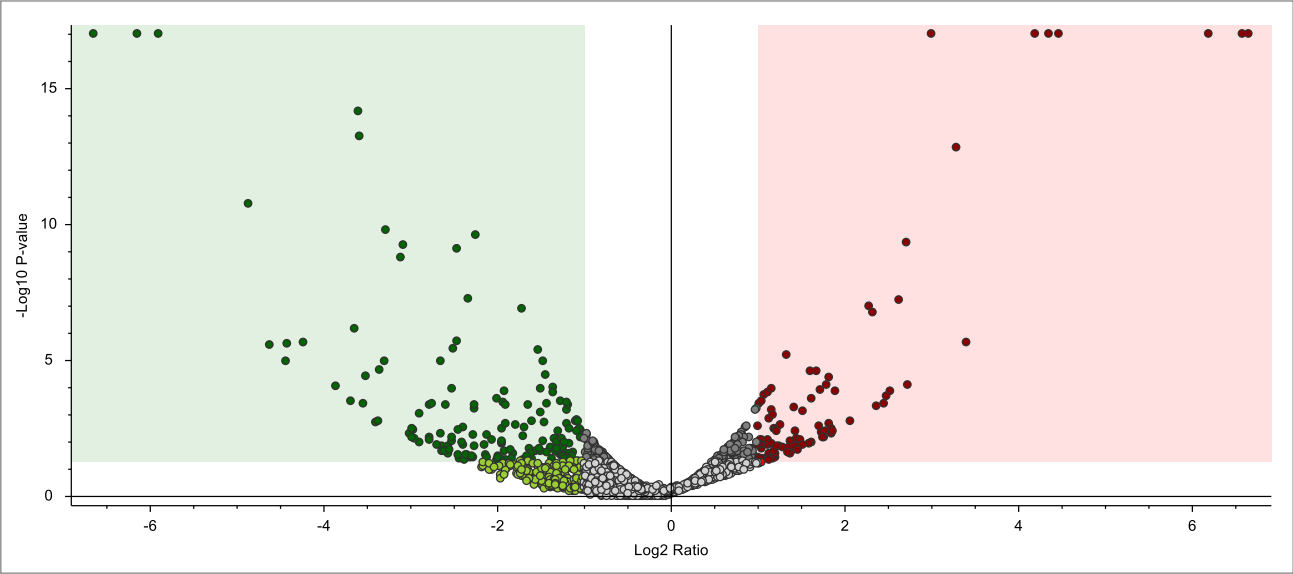

**c**
