# Supplementary figures and images for: Generation of Periventricular Reactive Astrocytes Overexpressing Aquaporin 4 Is Stimulated by Mesenchymal Stem Cell Therapy
Source: MDPI journal article supplement (doi:10.3390/ijms24065640), 2023-03-15

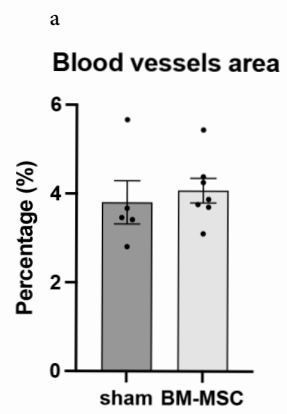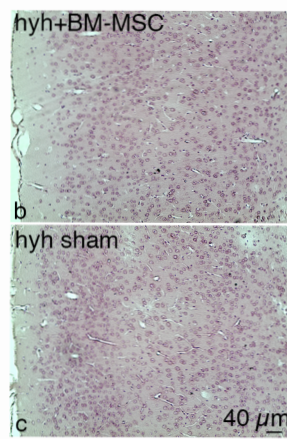

Supplement: s1 [file s1]
